# Supplementary material for: Stringent Response Factor DksA Contributes to Fatty Acid Degradation Function to Influence Cell Membrane Stability and Polymyxin B Resistance of Yersinia enterocolitica
Source: MDPI journal article supplement (doi:10.3390/ijms241511951), 2023-07-26
Supplement: s1 [file s1]

**Stringent response factor DksA contributes to fatty acid degradation  
function to influence cell membrane stability and polymyxin B  
resistance of *Yersinia enterocolitica***

**Can Huang<sup>1</sup>, Wenqian Li<sup>1</sup>, Jingyu Chen<sup>1\*</sup>**

1 Beijing Laboratory for Food Quality and Safety, College of Food Science &

Nutritional Engineering, China Agricultural University, Beijing 100083, China

\* Corresponding author: Jingyu Chen

Address: 17 Qinghua East Rd., Beijing 100083, China

E-mail: chenjy@cau.edu.cn

Supplementary Table S1 Primers used in this study

| Primers name       | DNA Sequences (5' to 3') | Application |
|--------------------|--------------------------|-------------|
| 16s rRNA-F         | GCACGTAATGGTGGGAAGCTC    | RT-qPCR     |
| 16S rRNA-R         | CTCCAATCCGGACTACGACA     | RT-qPCR     |
| YZ- <i>fadA</i> -F | AGTACCCGCCAGCCA          | RT-qPCR     |
| YZ- <i>fadA</i> -R | GAGCAGCAAACGCCT          | RT-qPCR     |
| YZ- <i>fadJ</i> -F | TGCAACAAGCACAGGCCTTG     | RT-qPCR     |
| YZ- <i>fadJ</i> -R | GATATCAGCACCAGCGATAAA    | RT-qPCR     |
| YZ- <i>fadE</i> -F | ACTGCGCCAATCCCT          | RT-qPCR     |
| YZ- <i>fadE</i> -R | GGTTCCCGCATCAATCGC       | RT-qPCR     |
| YZ- <i>fadD</i> -F | AGATGTGGTGGCGTTACAT      | RT-qPCR     |
| YZ- <i>fadD</i> -R | TTACTGTCTCGCCGAAACC      | RT-qPCR     |
| YZ- <i>fadR</i> -F | GACAGCGTGCCACAATTGAT     | RT-qPCR     |
| YZ- <i>fadR</i> -R | GCGTTATCGTCAACCGTCTG     | RT-qPCR     |
| YZ- <i>fadI</i> -F | CCCTTTGCCAAGCAGGCTAC     | RT-qPCR     |
| YZ- <i>fadI</i> -R | TCAATCAATTGAGGAGCAAC     | RT-qPCR     |
| YZ- <i>fabA</i> -F | TGGGCCTTGATGCCATGT       | RT-qPCR     |
| YZ- <i>fabA</i> -R | CTGGCAGGACTTGC           | RT-qPCR     |
| YZ- <i>fabB</i> -F | GAATTTAAAGACGCAGGCATG    | RT-qPCR     |
| YZ- <i>fabB</i> -R | AAGCGCAGCACTTTACGGTC     | RT-qPCR     |
| YZ- <i>fabD</i> -F | GTGGCAGTTAGTGCAACAAG     | RT-qPCR     |
| YZ- <i>fabD</i> -R | CTGCCAAACGCGCCAGATAG     | RT-qPCR     |
| YZ- <i>fabF</i> -F | GCCAGTAGGCGATCTCGG       | RT-qPCR     |
| YZ- <i>fabF</i> -R | GACCAGTCGCTGACTTAGT      | RT-qPCR     |
| YZ- <i>fabY</i> -F | GATGCTTATGATGCAATGGC     | RT-qPCR     |
| YZ- <i>fabY</i> -R | TCTCACTGATGGGTCTACCG     | RT-qPCR     |
| YZ- <i>fabR</i> -F | TTTGCGGGAGGTCTCCCG       | RT-qPCR     |
| YZ- <i>fabR</i> -R | CGCTTTCGTCGACCATTGTC     | RT-qPCR     |
| YZ- <i>fabG</i> -F | TATTGGTACTGCGACCAGTG     | RT-qPCR     |
| YZ- <i>fabG</i> -R | CTCGATTGACGCGGGATCCA     | RT-qPCR     |

Supplementary Table S2 Growth gap between YEND and WT when exposed to polymyxin B

| Time (h) | 0 MIC  | 1/2 MIC | 1/4 MIC | 1/8 MIC |
|----------|--------|---------|---------|---------|
| 10       | 6.55%  | 6.80%   | 5.93%   | 5.36%   |
| 20       | 11.36% | 19.52%  | 12.03%  | 11.27%  |
| 30       | 15.88% | 20.35%  | 17.35%  | 16.15%  |
| 40       | 10.24% | 16.91%  | 13.09%  | 11.49%  |
| 50       | 7.82%  | 10.66%  | 9.49%   | 8.93%   |

Growth Gap = (biomass of WT-biomass of YEND)/ biomass of WT

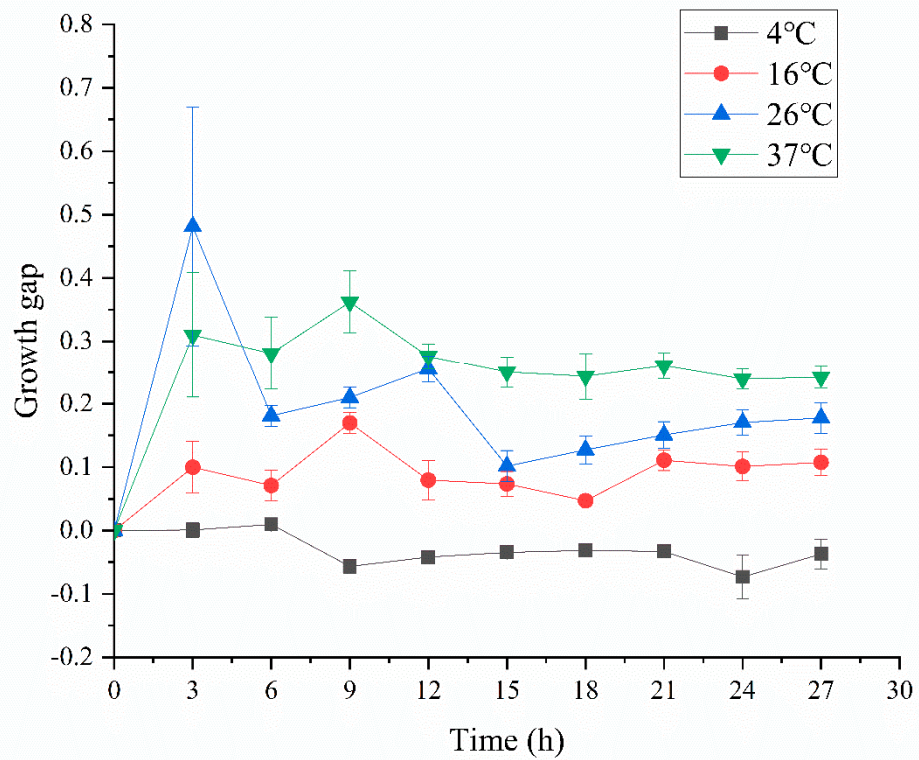

Supplementary Figure S1 Growth gap between YEND strain and WT strain at different temperatures. Growth Gap = (biomass of WT-biomass of YEND)/ biomass of WT, Data are mean of growth gap for three independent experiments and standard errors of the means.
